# Supplementary material for: The comparable tumour microenvironment in sporadic and NF2-related schwannomatosis vestibular schwannoma
Source: PubMed Central journal article supplement (PMC10481781; doi:10.1093/braincomms/fcad197), 2023-07-21
Supplement: fcad197_Supplementary_Data.pdf [file fcad197_Supplementary_Data.pdf]

## SUPPLEMENTARY INFORMATION

| Compartment                  | Acronym                                        | Name                                           |
|------------------------------|------------------------------------------------|------------------------------------------------|
| Schwann Cell                 | S100B                                          | S100 calcium-binding protein B                 |
|                              | GPM6B                                          | Glycoprotein M6B                               |
|                              | GFRA3                                          | GDNF family receptor alpha-3                   |
|                              | CCND1                                          | Cyclin D1                                      |
|                              | GPX3                                           | Glutathione peroxidase 3                       |
|                              | VEGFA                                          | Vascular endothelial growth factor A           |
|                              | NCMAP                                          | Non-compact myelin associated protein          |
|                              | PRX                                            | Periaxin                                       |
| Macrophage                   | C1QC                                           | Complement C1q C chain                         |
|                              | GPR34                                          | G protein-coupled receptor 34                  |
|                              | SPP1                                           | Secreted phosphoprotein 1                      |
|                              | HSPA1A/B                                       | Heat shock 70 kDa protein 1                    |
|                              | SLC2A5                                         | Solute carrier family 2 member 5               |
|                              | CX3CR1                                         | C-X3-C motif chemokine receptor 1              |
|                              | PDK4                                           | Pyruvate dehydrogenase kinase 4                |
|                              | GPNMB                                          | Glycoprotein NMB                               |
|                              | MTRNR2L12                                      | MT-RNR2 Like 12                                |
|                              | TOP2A                                          | DNA topoisomerase II-alpha                     |
|                              | MKI67                                          | Marker of proliferation Ki-67                  |
|                              | MT-CO1                                         | Mitochondrially encoded cytochrome C oxidase 1 |
|                              | MT-CO2                                         | Mitochondrially encoded cytochrome C oxidase 2 |
| MT-CO3                       | Mitochondrially encoded cytochrome C oxidase 3 |                                                |
| Vascular smooth muscle cells | ACTA2                                          | Actin alpha 2                                  |
|                              | TAGLN                                          | Transgelin                                     |
| Fibroblasts                  | DCN                                            | Decorin                                        |
|                              | CYP1B1                                         | Cytochrome P450 family 1 subfamily B member 1  |
| Endothelial cells            | PLVAP                                          | Plasmalemma vesicle associated protein         |
|                              | FLT1                                           | Fms related receptor tyrosine kinase 1         |
| T-cells                      | CCL5                                           | C-C motif chemokine ligand 5                   |
|                              | TRBC2                                          | T cell receptor beta constant 2                |
| Mast cells                   | TPSAB1                                         | Tryptase alpha/beta 1                          |
|                              | TPSB2                                          | Tryptase beta 2                                |
| Neutrophils                  | S100A9                                         | S100 calcium binding protein A9                |
|                              | S100A8                                         | S100 calcium binding protein A8                |

**Supplementary Table 1 Genes used to manually annotate single cell RNA-seq clusters.** Published single cell RNA sequencing data from three sporadic VS samples from Xu *et al.* (2022)<sup>33</sup> were obtained from the National Omics Data Encyclopaedia (<https://www.biosino.org/node>; accession code OEP001871)

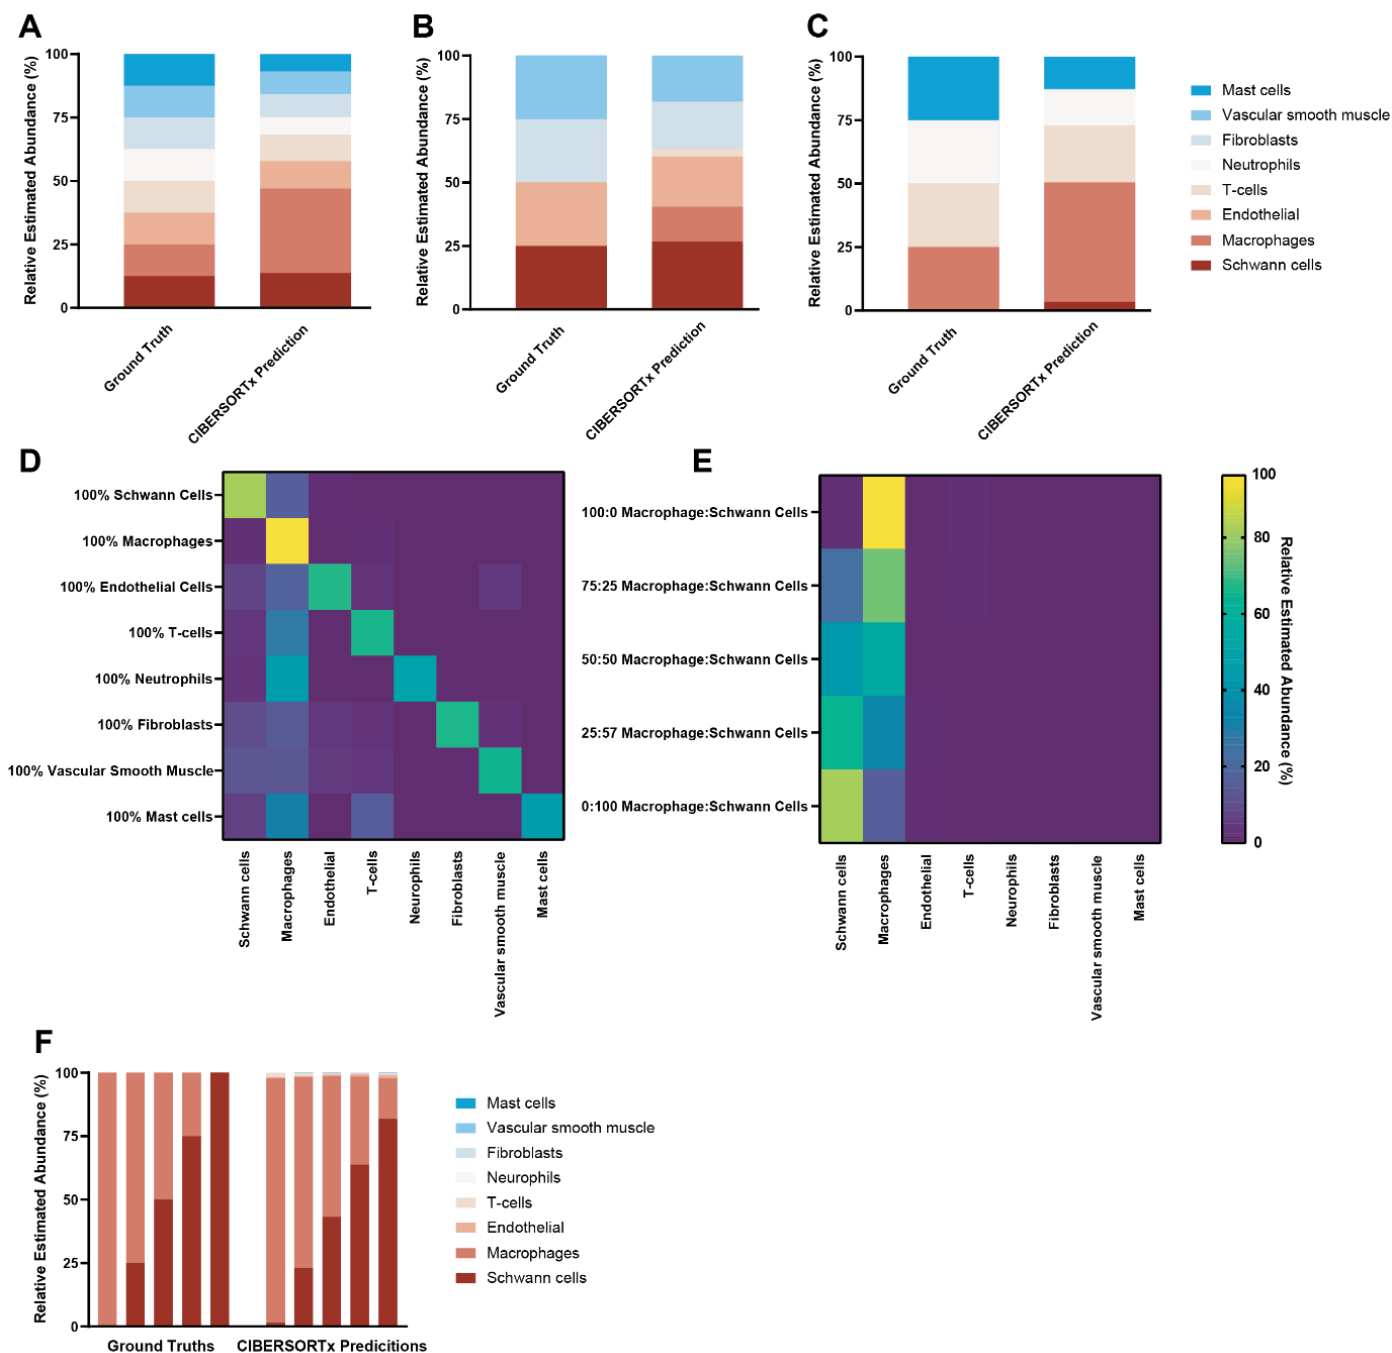

**Supplementary Fig.1** The CIBERSORTx signature matrix specific to vestibular schwannoma (VS) tumours can be used to accurately deconvolve bulk transcriptomic data. Published single cell RNA sequencing data from three sporadic VS samples from Xu *et al.* (2022)<sup>33</sup> were obtained from the National Omics Data Encyclopaedia (<https://www.biosino.org/node; accession code OEP001871>). **(A-C)** CIBERSORTx prediction of relative estimated abundance of cell-type populations was used to identify cell populations present within the ground truth pseudo-bulk data. **(D)** Relative estimated abundance of single-population pseudo-bulk data. **(E-F)** The relative estimated abundances of pseudo-bulk data from different proportions of macrophages:Schwann cells.

| Compartment  | Acronym         | Antigen                                       | Target              | Clone                             | Supplier                                              |
|--------------|-----------------|-----------------------------------------------|---------------------|-----------------------------------|-------------------------------------------------------|
| Schwann Cell | S100B           | S100 calcium-binding protein B                | Schwann cell        | EP1576Y                           | Abcam (ab215989)                                      |
|              | Pan-Cytokeratin | -                                             | Tumour cells        | AE-1/AE-3                         | BioLegend (914204)                                    |
|              | Vimentin        | -                                             | Tumour cells        | RV202                             | Novus Biologicals (NBP1-97672)                        |
| Immune       | Iba1            | Ionised calcium-binding adaptor molecule 1    | Macrophages         | Polyclonal                        | FUJIFILM Wako Pure Chemical Corp (019-19741)          |
|              | CD68            | -                                             | Macrophages         | KP1                               | BioLegend (916104)                                    |
|              | CX3CR1          | Fractalkine receptor                          | Immune cells        | Polyclonal                        | Abcam (ab8020)                                        |
|              | CD8a            | CD8 alpha chain                               | CD8 T-cells         | C8/144B                           | eBioscience (14-0085-82)                              |
|              | CD3             | -                                             | T-cells             | D7A6E (sporadic),<br>CD3-12 (NF2) | Cell Signalling Technology (85061), Bio-Rad (MCA1477) |
| Vasculature  | SMA             | Smooth muscle actin                           | Smooth muscle cells | 1A4                               | Bio-Rad (MCA5781GA)                                   |
|              | CD31            | Platelet endothelial cell adhesion molecule 1 | Endothelial cells   | JC/70A                            | Novus Biologicals (NB600-562)                         |
|              | vWF             | Von Willebrand factor                         | Endothelial cells   | Polyclonal                        | DAKO, Agilent (A0082)                                 |

**Supplementary Table 2 Antibody panel for Hyperion imaging mass cytometry.**

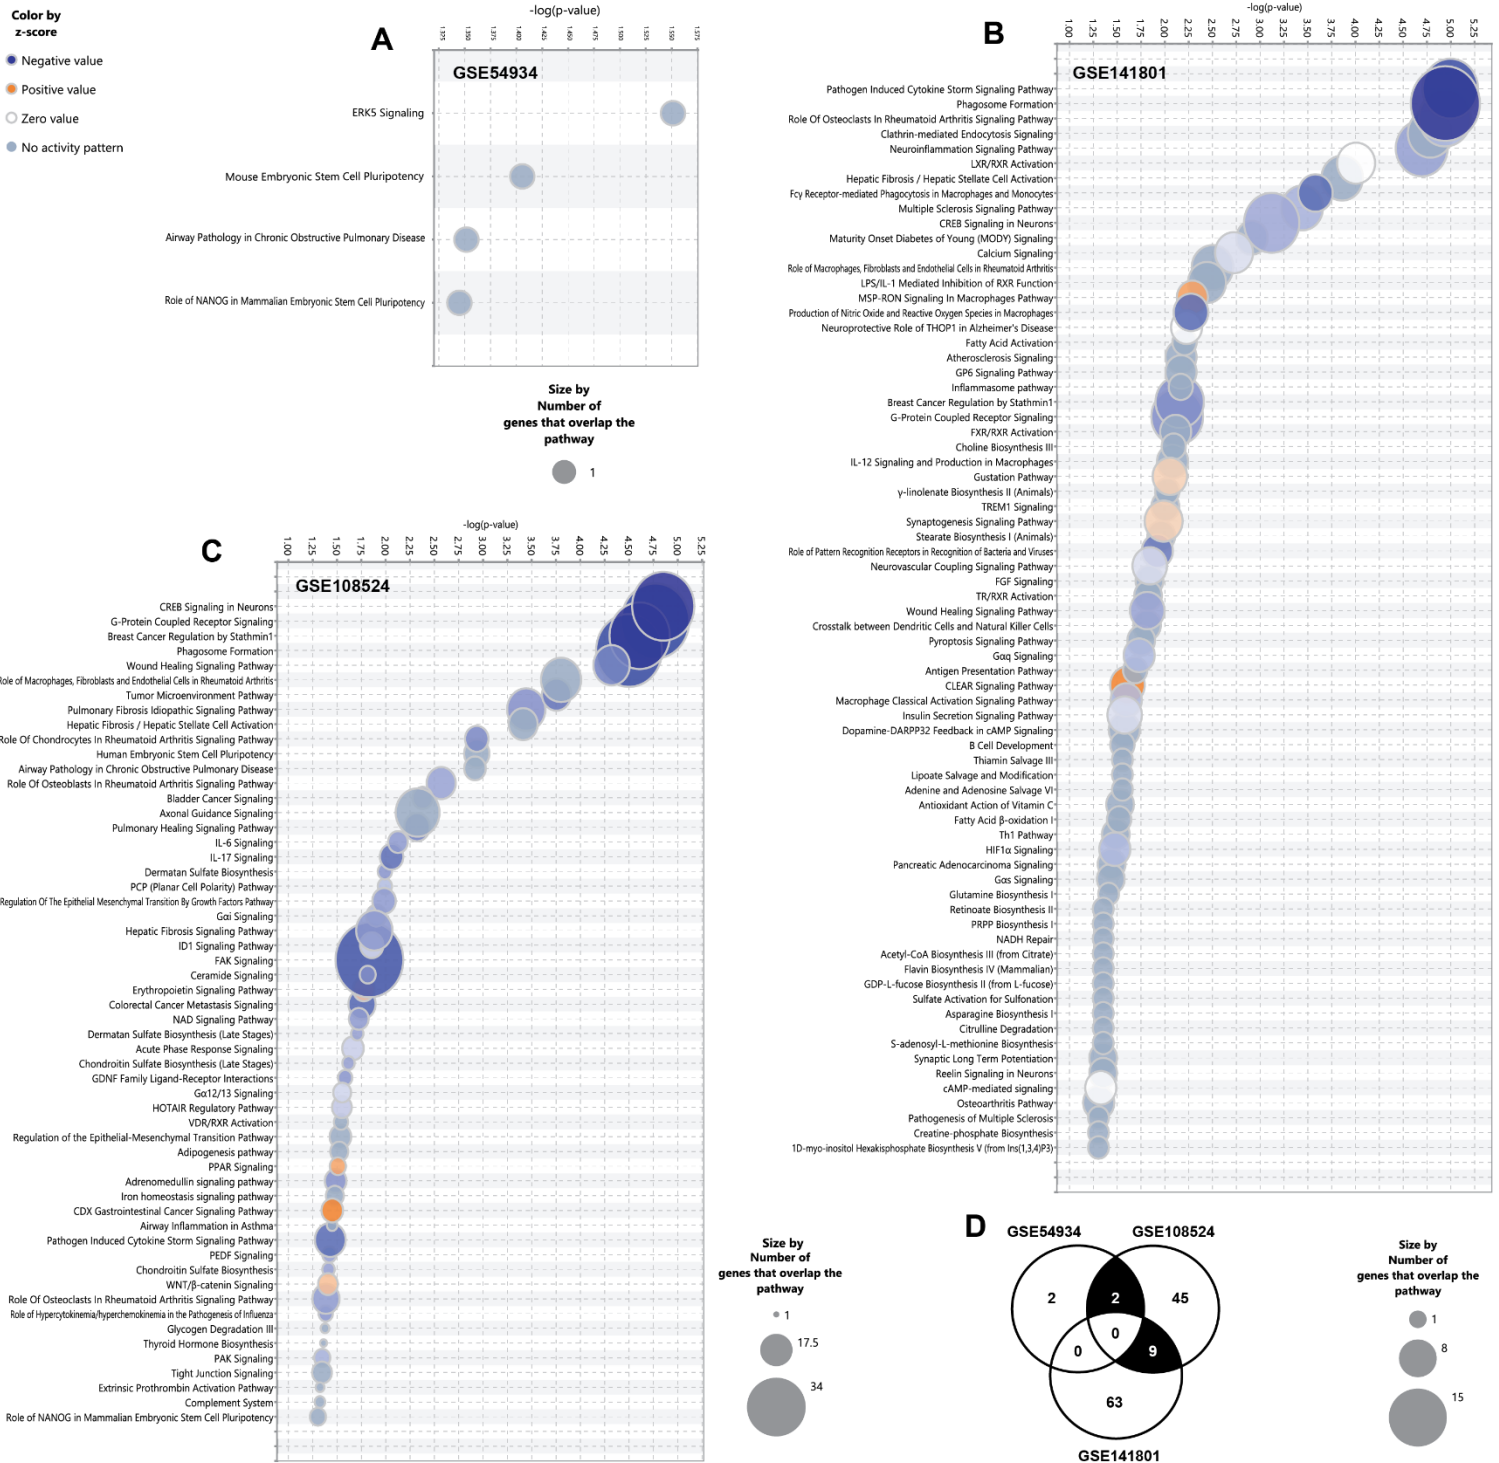

**Supplementary Fig.2 Differentially expressed genes (DEG) between *NF2*-schwannomatosis and sporadic vestibular schwannoma (VS) are unlikely to represent a conserved, biologically relevant difference in the tumours.** GSE54934, GSE108524 and GSE141801 available from Gene Expression Omnibus. **(A-C)** Significantly enriched signalling pathways using Ingenuity Pathway Analysis (IPA) from *NF2*-SWN compared to sporadic VS. **(D)** Overlap of the significantly enriched signalling pathways from IPA observed between the three datasets.  $P\text{-value} \leq 0.05$ .
